# Supplementary material
Source: PubMed Central journal article supplement (PMC8193644)
Supplement: NIHMS1620053-supplement-2.pdf [file NIHMS1620053-supplement-2.pdf]

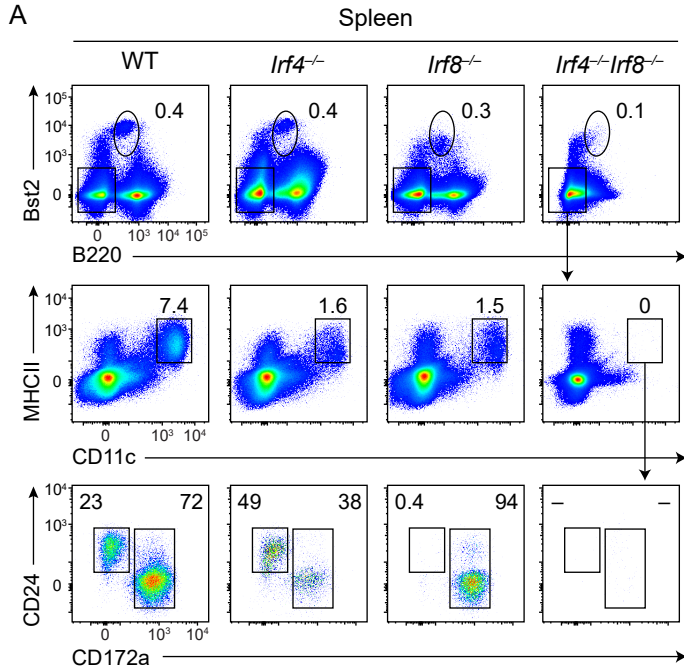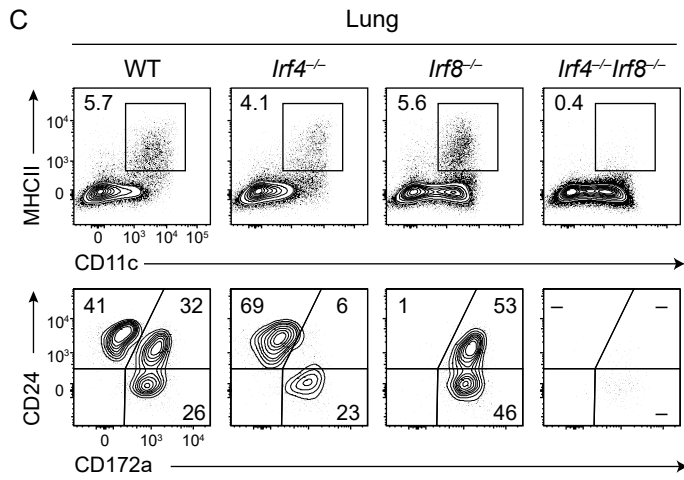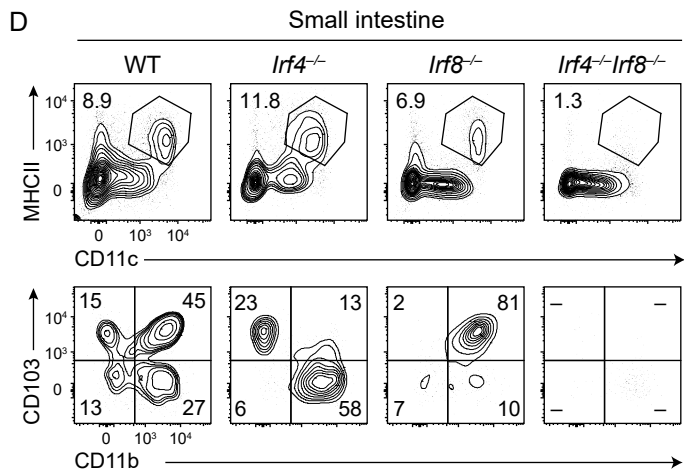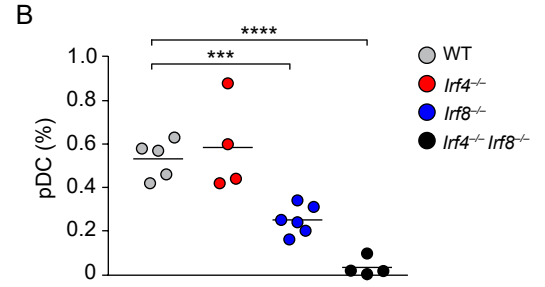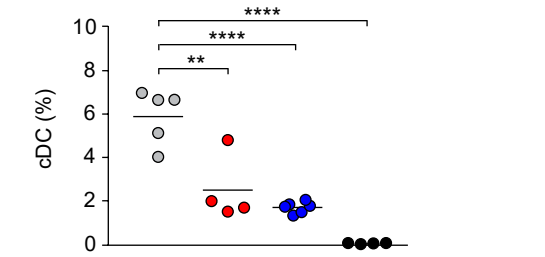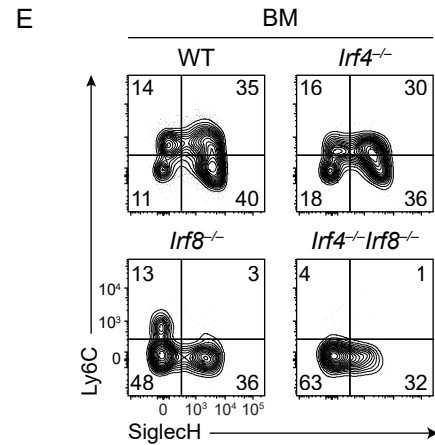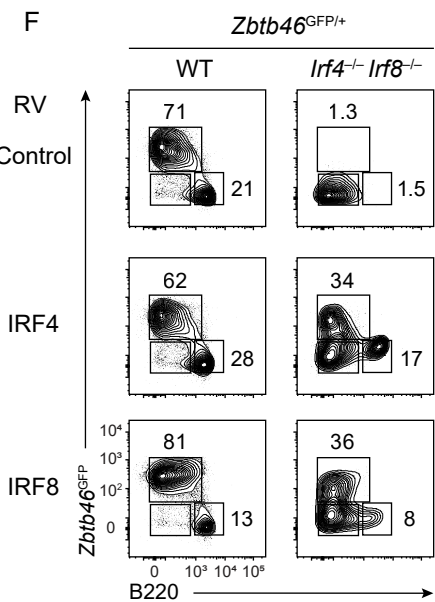

**Figure S1. DC analysis in the spleen and peripheral tissues of *Irf4*<sup>-/-</sup>, *Irf8*<sup>-/-</sup>, or *Irf4*<sup>-/-</sup> *Irf8*<sup>-/-</sup> mice, related to Figure 1.**

(A and B) Analysis of splenic cDCs from WT, *Irf4*<sup>-/-</sup>, *Irf8*<sup>-/-</sup>, and *Irf4*<sup>-/-</sup> *Irf8*<sup>-/-</sup> mice. (A) Flow cytometric analysis showing splenic pDC (top), cDC (middle), CD24<sup>+</sup> CD172a<sup>-</sup> cDC1, and CD172a<sup>+</sup> cDC2 (bottom). (B) Scatter plots show the average percentages of pDCs (top) and cDCs (bottom, pre-gate: Bst2<sup>-</sup> B220<sup>-</sup> cells) in the splenocytes of the indicated genotypes (bar = average %,  $n = 4 \sim 5$  mice per group). \*\*  $P < 0.01$ , \*\*\*  $P < 0.001$ , \*\*\*\*  $P < 0.0001$  (Student's *t*-test). (C and D) Flow cytometric analysis showing cDC in the lung and small intestine lamina propria of the indicated genotypes. Pre-gate: CD45<sup>+</sup> Ly6C<sup>-</sup> Ly6G<sup>-</sup> CD3<sup>-</sup> B220<sup>-</sup> cells. Data shown is one of more than three similar analyses. (E) Flow cytometric analysis showing BM progenitor cells from the indicated genotypes. Pre-gate: Lineage<sup>-</sup> CD11c<sup>+</sup> MHCII<sup>-</sup> CD135<sup>+</sup> CD172a<sup>-</sup> cells. Data shown is one of three similar experiments. (F) Representative flow cytometric analysis showing *Zbtb46*<sup>GFP+</sup> cells differentiated from *Zbtb46*<sup>GFP/+</sup> or *Irf4*<sup>-/-</sup> *Irf8*<sup>-/-</sup> *Zbtb46*<sup>GFP/+</sup> CD117<sup>hi</sup> BM progenitors retrovirally expressing either *Irf4* or *Irf8*. Data shown is one of two similar analyses. Numbers in the two-color histograms indicate percentages of the gated cells.

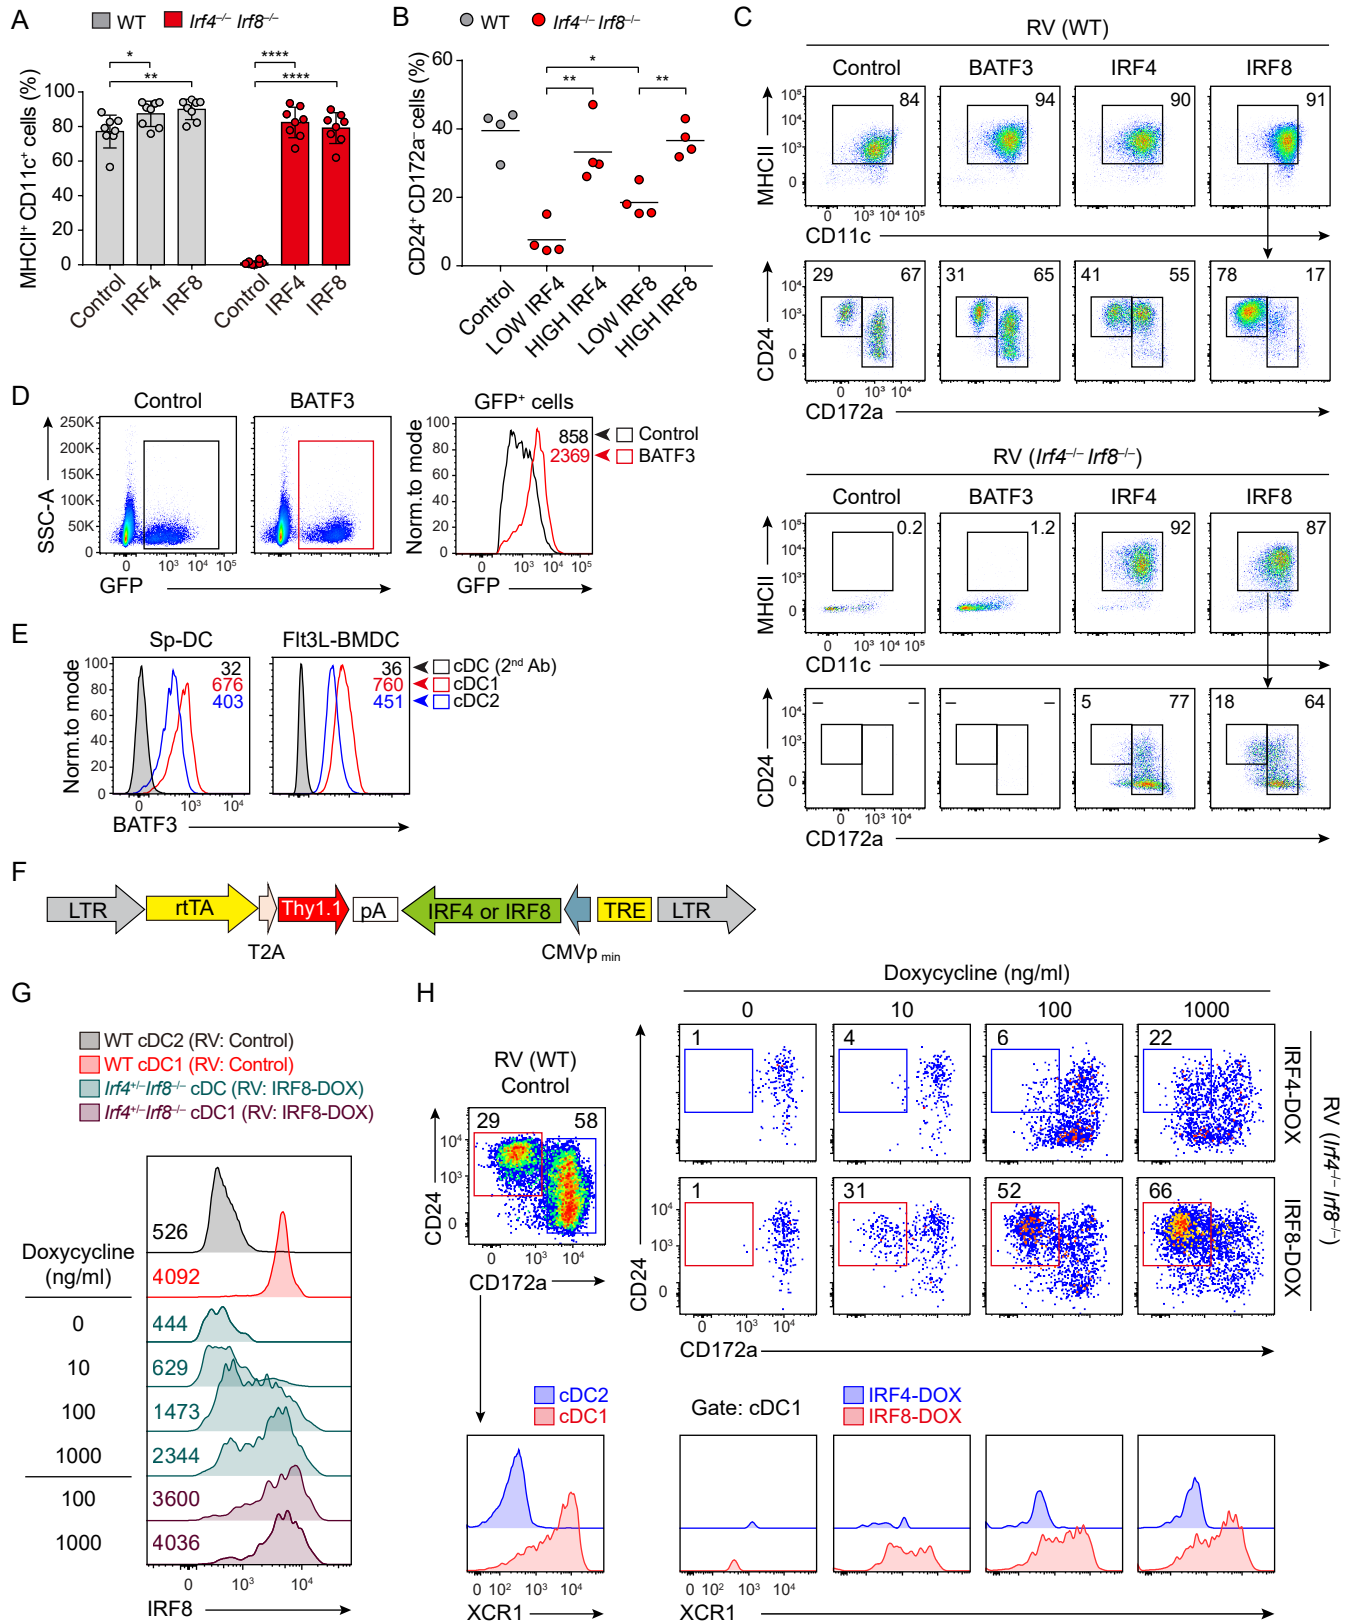

**Figure S2. Phenotypic analysis of cDCs restored by retroviral *Irf4* or *Irf8*, related to Figure 2.**

(A-C) Analysis of cDCs differentiated from WT or *Irf4*<sup>-/-</sup> *Irf8*<sup>-/-</sup> CD117<sup>hi</sup> BM progenitors retrovirally expressing either *Irf4* or *Irf8* without or with *Batf3* co-expression. (A) A bar graph showing average percentages of MHCII<sup>+</sup> CD11c<sup>+</sup> cDCs ± SD (*n* = 8), (B) A scatter plot showing the average percentages of CD24<sup>+</sup> CD172a<sup>-</sup> cDC1 (bar = average %, *n* = 4) at the indicated conditions. \**P* < 0.05, \*\* *P* < 0.01, \*\*\*\* *P* < 0.0001 (Student's *t*-test). (C) Flow cytometric analysis showing cDCs differentiated from WT (top) or *Irf4*<sup>-/-</sup> *Irf8*<sup>-/-</sup> (bottom) BM progenitors retrovirally expressing *Batf3*, *Irf4*, or *Irf8*. Some of the histogram panels are redundantly shown in Figure 2B. (D) Flow cytometric analysis showing retroviral GFP expression by control RV (black)- or *Batf3* RV (red)-transduced cells. (E) Flow cytometric analysis showing BATF3 expression in the splenic cDCs (left) and BM-derived cDCs (right). (F) A retroviral construct to express IRF4 or IRF8 driven by CMVp<sub>min</sub> in combination with tetracycline responsive element (TRE) activity. rtTA denotes reverse tetracycline-controlled transactivator. (G and H) Flow cytometric analysis of cDCs differentiated from WT, *Irf4*<sup>+/-</sup> *Irf8*<sup>-/-</sup> or *Irf4*<sup>-/-</sup> *Irf8*<sup>-/-</sup> BM progenitors retrovirally expressing various amounts of either *Irf4* or *Irf8* by doxycycline treatment (0, 10, 100, or 1000 ng/ml). (G) Expression of IRF8 in the *Irf4*<sup>+/-</sup> *Irf8*<sup>-/-</sup> cDC restored at the indicated conditions. (H) Flow cytometric analysis showing cDC1 and cDC2 differentiated from *Irf4*<sup>-/-</sup> *Irf8*<sup>-/-</sup> BM progenitors with various amounts of retroviral *Irf4* or *Irf8* achieved by treatment with the indicated concentrations of doxycycline. Single-color histograms below show XCR1 expression on the gated CD24<sup>+</sup> CD172a<sup>-</sup> cDC1 under the same conditions. The data shown is one of three similar experiments. Numbers in the single-color and two-color histograms indicate the geometric MFI and the percentage of the gated cells, respectively.

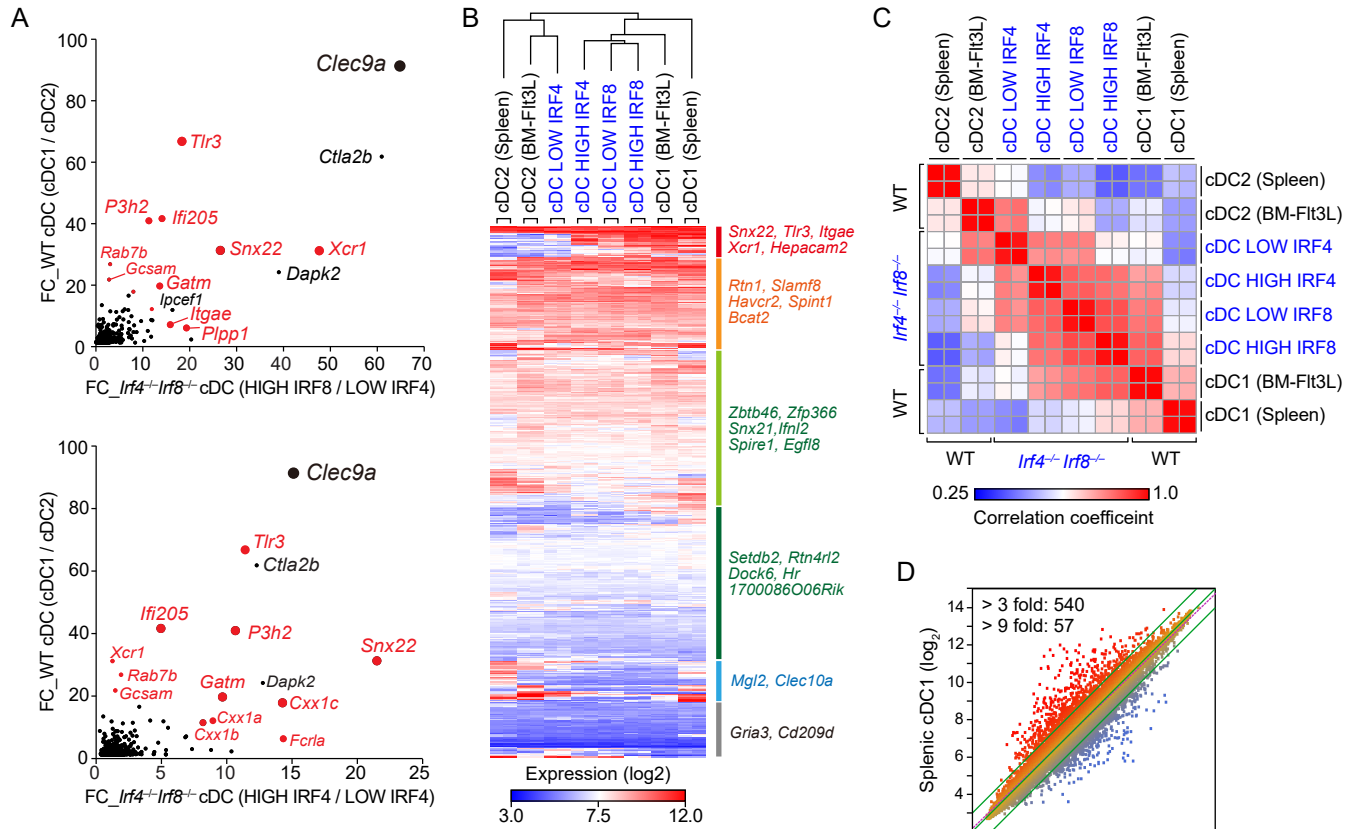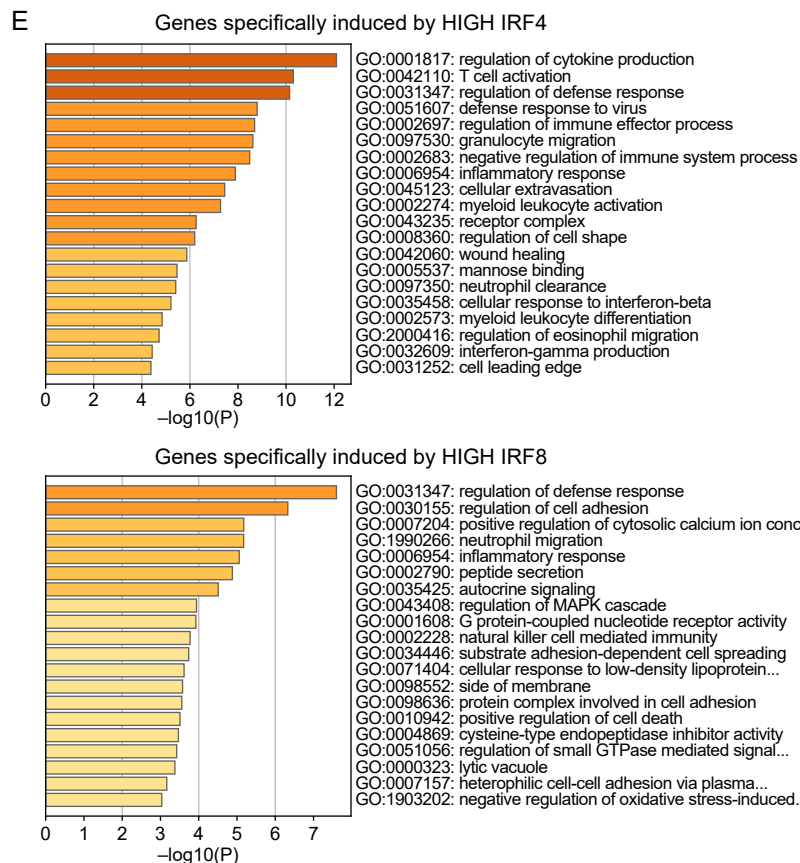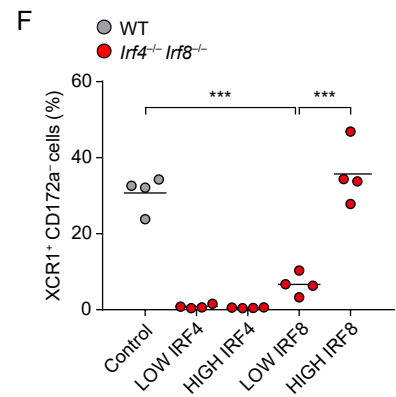

**Figure S3. Transcriptomic analysis of cDCs restored by retroviral *Irf4* or *Irf8*, related to Figure 3.**

(A-D) Microarray analysis of cDCs differentiated from WT or *Irf4*<sup>-/-</sup> *Irf8*<sup>-/-</sup> CD117<sup>hi</sup> BM progenitors retrovirally expressing either *Irf4* or *Irf8* without or with *Batf3* co-expression. (A) Scatter plots showing the top 3000 genes with > 2-fold expression in cDC1 compared to cDC2. Axes depict fold change ratios (FC) of cDC1 to cDC2 from WT mice (y-axis) compared against those of high IRF8 to low IRF4 conditions (x-axis, top) or of high IRF4 to low IRF4 (x-axis, bottom) of *Irf4*<sup>-/-</sup> *Irf8*<sup>-/-</sup> mice. cDC1-specific genes are highlighted in red. (B and C) Heatmap and Spearman's rank correlation coefficient showing the expression of 462 DC-specific genes (log<sub>2</sub> values) in WT cDCs (black) and *Irf4*<sup>-/-</sup> *Irf8*<sup>-/-</sup> cDCs (blue) differentiated at the indicated conditions. (D) Scatter plots comparing gene expressions between splenic cDC and BM-derived cDC differentiated with Flt3L (top: cDC1 and bottom: cDC2). (E) Gene pathway analysis for the genes specifically controlled by either *Irf4* or *Irf8* using Metascape platform. (F) A scatter plot showing the average percentages of XCR1<sup>+</sup> CD172a<sup>-</sup> cDC1 (bar = average %, *n* = 4) differentiated from WT or *Irf4*<sup>-/-</sup> *Irf8*<sup>-/-</sup> BM progenitors at the indicated conditions. \*\*\* *P* < 0.001 (Student's *t*-test).

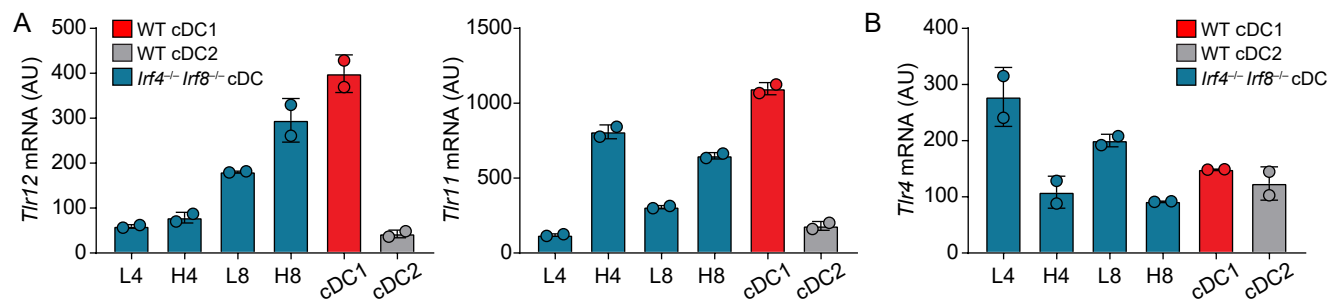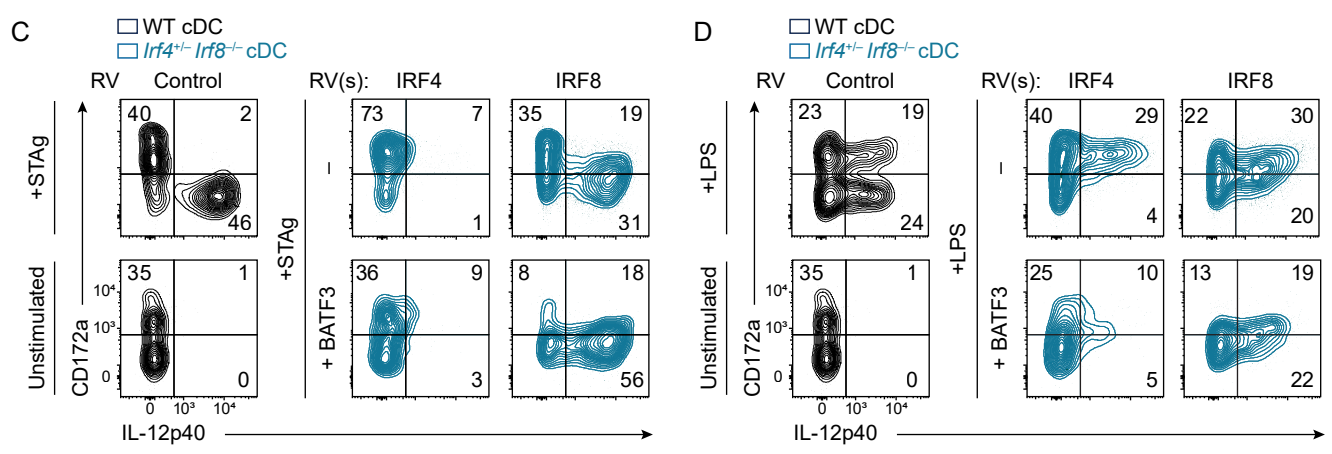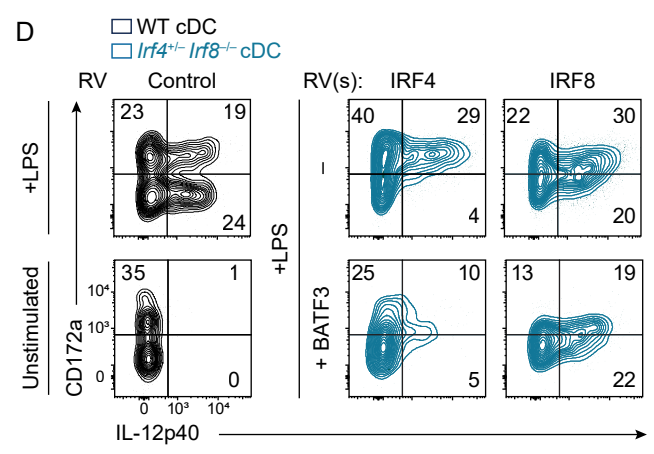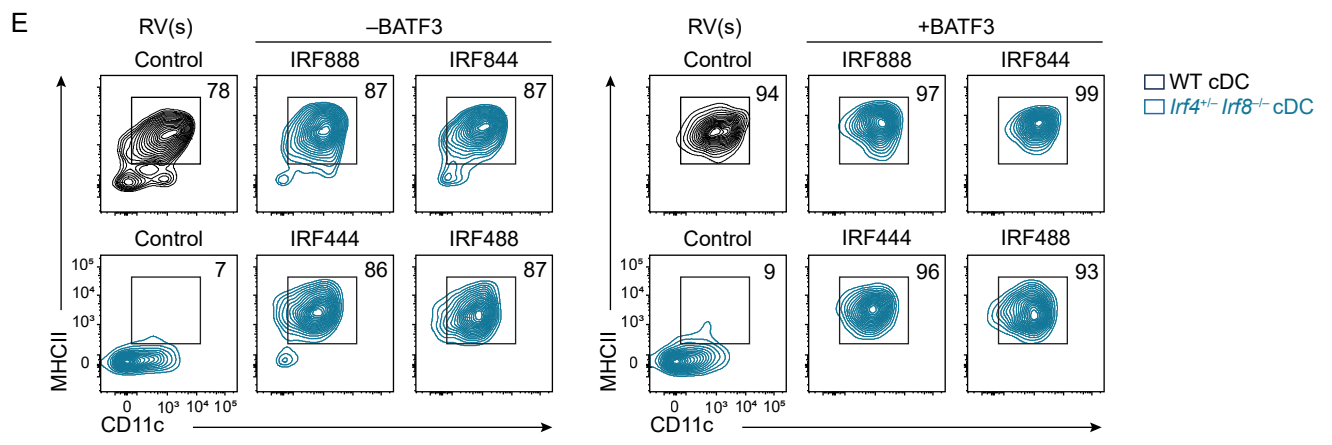

**Figure S4. Phenotypic and functional analysis of cDCs restored by retroviral *Irf4*, *Irf8*, or *Irf4-Irf8* chimeras, related to Figure 3.**

(A-E) Analysis of cDCs differentiated from WT, *Irf4*<sup>+/-</sup> *Irf8*<sup>-/-</sup>, or *Irf4*<sup>-/-</sup> *Irf8*<sup>-/-</sup> CD117<sup>hi</sup> BM progenitors retrovirally expressing either *Irf4* or *Irf8* without or with *Batf3* co-expression. (A and B) Microarray analysis showing mRNA expression of *Tlr12*, *Tlr11*, and *Tlr4* in the cDCs restored at the indicated conditions. L4 (LOW IRF4), H4 (HIGH IRF4), L8 (LOW IRF8), and H8 (HIGH IRF8). (C and D) Flow cytometric analysis showing IL-12 p40 production from the restored cDCs upon stimulation with either STAg (1 µg/ml) or *E. coli* LPS (1 µg/ml) for 6 h. Data shown is one of three similar experiments. (E) Flow cytometric analysis showing CD11c<sup>+</sup> MHCII<sup>+</sup> cDCs differentiated from *Irf4*<sup>+/-</sup> *Irf8*<sup>-/-</sup> BM progenitors expressed with retroviral *Irf4* (IRF444), *Irf8* (IRF888) or *Irf4-Irf8* chimeras (IRF488 or IRF844) without or with *Batf3* co-expression. Data shown is one of three similar experiments.



**A** Peaks shared by IRF4 and BATF3 (cDC2), # Tg seq. = 643

| Motif | P-value | % Tg/Bg | Best match   |
|-------|---------|---------|--------------|
|       | 1e-260  | 61/7.6  | PU.1 or SpiB |
|       | 1e-117  | 37/6.2  | AP-1         |
|       | 1e-102  | 13/0.3  | AP-1-IRF     |
|       | 1e-45   | 22/5.3  | RUNX         |

**B** LOW IRF4 vs. HIGH IRF4  
198 genes (HIGH IRF4 > LOW IRF4, > 2 fold)  
IRF8 ChIP-seq for cDC1: # Tg seq. = 326

| Motif | P-value | % Tg/Bg | Best match   |
|-------|---------|---------|--------------|
|       | 1e-100  | 51/7.0  | PU.1-IRF     |
|       | 1e-59   | 37/6.1  | PU.1 or SpiB |
|       | 1e-26   | 12/1.2  | AP-1-IRF     |
|       | 1e-13   | 15/4.1  | ZNF          |
|       | 1e-13   | 2.5/0   | PU.1 or SpiB |

\* cDC differentiated from *Irf4*<sup>-/-</sup>*Irf8*<sup>-/-</sup> BM progenitors

**C** HIGH IRF4 vs. HIGH IRF8  
190 genes (HIGH IRF8 > HIGH IRF4, > 2 fold)  
IRF8 ChIP-seq for cDC1: # Tg seq. = 474

| Motif | P-value | % Tg/Bg | Best match   |
|-------|---------|---------|--------------|
|       | 1e-176  | 52/5.7  | PU.1-IRF     |
|       | 1e-58   | 18/1.8  | PU.1 or SpiB |
|       | 1e-33   | 10/0.9  | AP-1-IRF     |
|       | 1e-17   | 11/2.4  | AP1          |
|       | 1e-15   | 9.9/2.4 | RUNX         |

\* cDC differentiated from *Irf4*<sup>-/-</sup>*Irf8*<sup>-/-</sup> BM progenitors

**D** BATF3+JUNB: + + + + + + + + + +  
IRF(s): - -

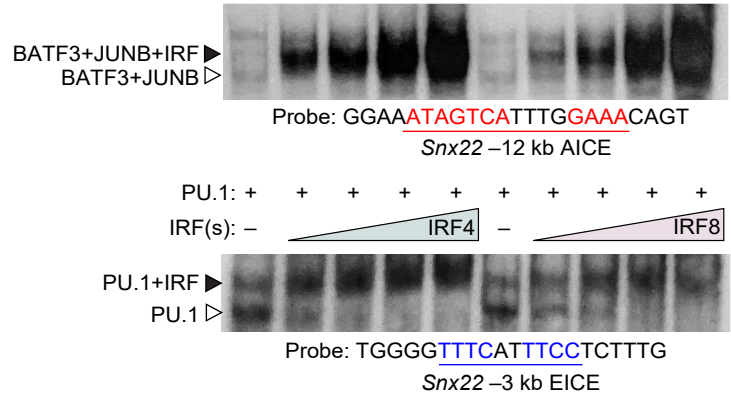

**E**

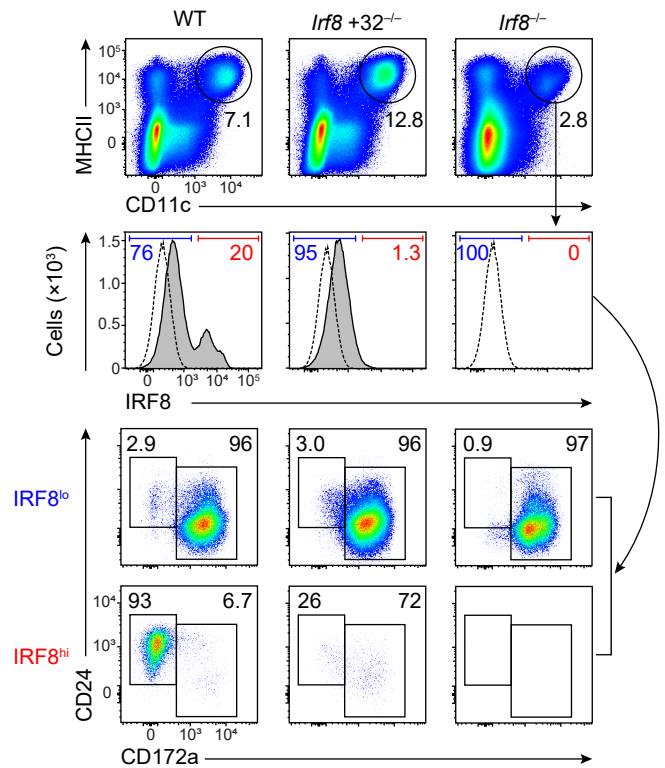

**Figure S5. High amounts of IRF4 bind AICE, related to Figure 5.**

(A) *De novo* motif analysis for ChIP-seq peaks shared by IRF4 and BATF3 in cDC2. (B and C) *De novo* DNA motifs for IRF8 ChIP-seq peaks merged with (B) 198 increased genes (> 2 fold) at high IRF4 condition compared to low IRF4 condition, or (C) 190 increased genes (> 2 fold) at high IRF8 condition compared to high IRF4 condition. Differentially expressed gene sets between the compared conditions were selected based on microarray analysis of *Irf4*<sup>-/-</sup> *Irf8*<sup>-/-</sup> cDCs restored by retroviral *Irf4* or *Irf8* without or with *Batf3* co-expression (Table S1). Genomic regions selected for motif analysis: gene body ± 50 kb. # Tg seq. and % Tg/Bg denote the number of total target sequences and percentage of target/percentage of background sequence, respectively. (D) EMSA showing bindings of either IRF4 or IRF8 to DNA containing AICE (top) or EICE (bottom). Probe sequences containing AICE (*Snx22* -12 kb, AICE: red) or EICE (*Snx22* -3 kb, EICE: blue) are indicated below each of the gels. (E) Flow cytometric analysis showing IRF8 expression in splenic cDC of the indicated genotypes (top and second from the top). Pre-gate: CD64<sup>-</sup> B220<sup>-</sup> cells. Two-color histograms at the bottom show the proportions of cDC1 and cDC2 in the IRF8<sup>lo</sup> (second from the bottom) and IRF8<sup>hi</sup> (bottom) cDC populations. Numbers in the histograms are the percentages of the gated cells.

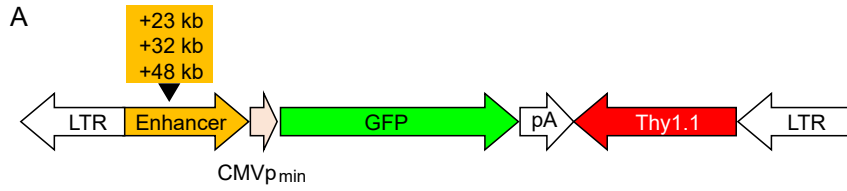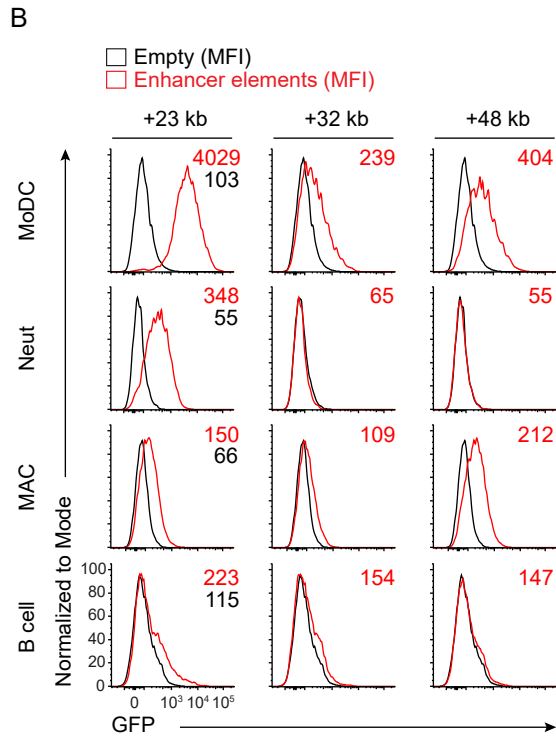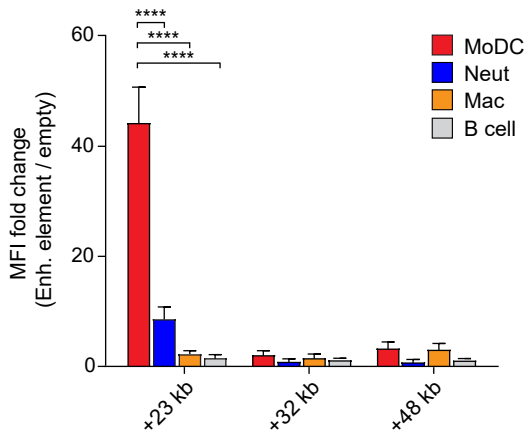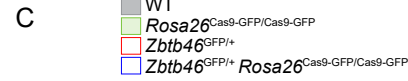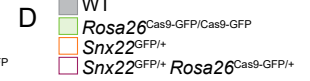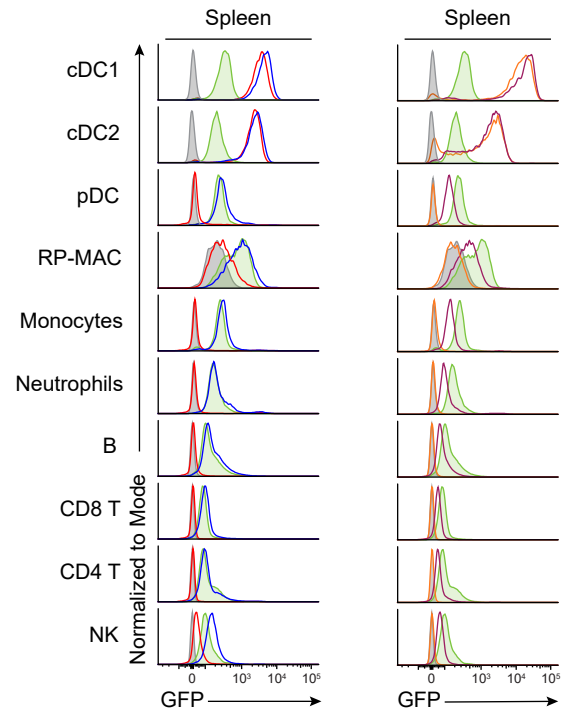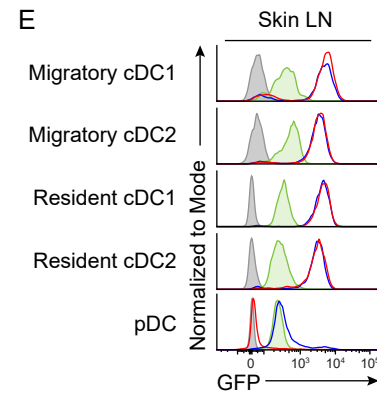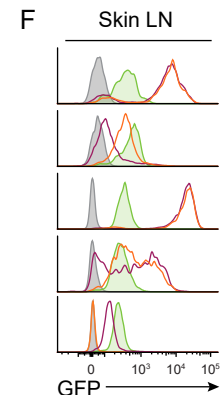

**Figure S6. Transcriptional activity of *Zbtb46* enhancer elements and expression of *Zbtb46*<sup>GFP</sup> or *Snx22*<sup>GFP</sup> in various immune cells, related to Figures 6 and 7.**

(A) A retroviral construct to assess integrated GFP-reporter activity driven by CMV<sub>p<sub>min</sub></sub> in combination with various enhancer elements. (B) Flow cytometric analysis for GFP-reporter activities in MoDC, neutrophils (Neut), macrophages (MAC), or splenic B cells transduced with empty retrovirus (black) or retroviruses expressing *Zbtb46* +23 kb, +32 kb, or +48 kb elements (red). Culture methods for each cell type are described in the 'experimental model and subject details' section of the STAR METHODS. A bar graph below shows average MFI fold changes (MFI of enhancer element / MFI of empty) ± SD for each cell type ( $n = 4$ ). \*\*\*\*  $P < 0.0001$  (Student's  $t$ -test). (C-F) Flow cytometric analysis showing GFP expression of various immune cells in the (C and D) spleen or (E and F) skin-draining lymph nodes from mice of the indicated genotypes. Gating strategies to identify the indicated cell types are as followings: (i) in the spleen, cDC pre-gate: F4/80<sup>-</sup> Bst2<sup>-</sup> B220<sup>-</sup> CD11c<sup>+</sup> MHCII<sup>+</sup> cells, cDC1: CD24<sup>+</sup> CD172a<sup>-</sup> cells, cDC2: CD172a<sup>+</sup> cells, pDC: F4/80<sup>-</sup> Bst2<sup>+</sup> B220<sup>+</sup> cells, red pulp macrophages (RP-MAC): F4/80<sup>+</sup> CD64<sup>+</sup> MHCII<sup>int</sup> CD11c<sup>int</sup> cells, monocytes: B220<sup>-</sup> CD11b<sup>+</sup> Ly6C<sup>hi</sup> Ly6G<sup>-</sup> cells, neutrophils: B220<sup>-</sup> CD11b<sup>+</sup> Ly6C<sup>int</sup> Ly6G<sup>+</sup> cells, B cells: B220<sup>+</sup> MHCII<sup>+</sup> cells, CD4<sup>+</sup> T cells: B220<sup>-</sup> CD3<sup>+</sup> CD4<sup>+</sup> cells, CD8<sup>+</sup> T cells: B220<sup>-</sup> CD3<sup>+</sup> CD8<sup>+</sup> cells, and NK cells: B220<sup>-</sup> NK1.1<sup>+</sup> cells, (ii) in the skin lymph nodes, cDC pre-gate: F4/80<sup>-</sup> Bst2<sup>-</sup> B220<sup>-</sup> EpCAM<sup>-</sup> cells, migratory cDC1: MHCII<sup>hi</sup> CD11c<sup>+</sup> CD24<sup>+</sup> CD172a<sup>-</sup> cells, migratory cDC2: MHCII<sup>hi</sup> CD11c<sup>+</sup> CD172a<sup>+</sup> cells, resident cDC1: MHCII<sup>int</sup> CD11c<sup>+</sup> CD24<sup>+</sup> CD172a<sup>-</sup> cells, resident cDC2: MHCII<sup>int</sup> CD11c<sup>+</sup> CD172a<sup>+</sup> cells, and pDC: F4/80<sup>-</sup> Bst2<sup>+</sup> B220<sup>+</sup> cells.

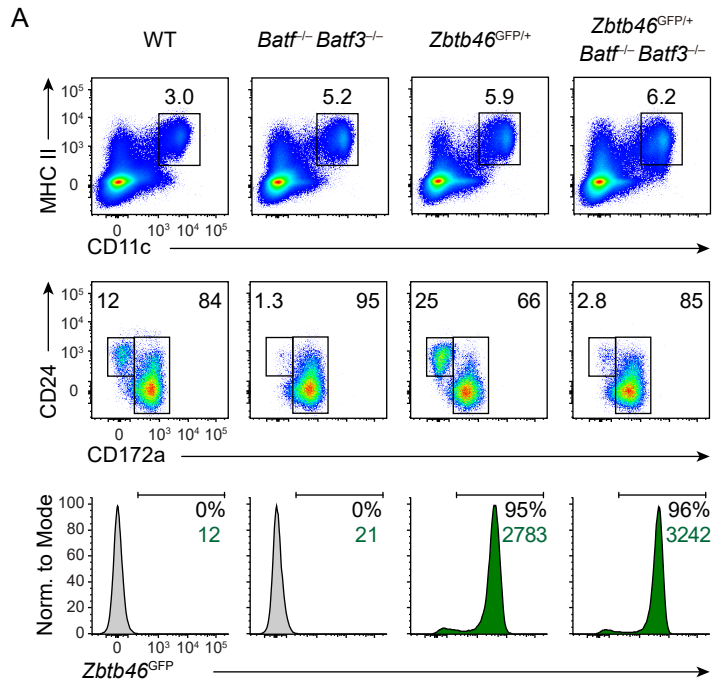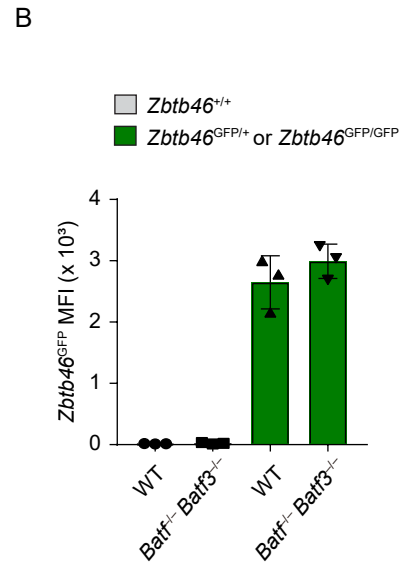

**Figure S7. *Batf*<sup>-/-</sup> *Batf3*<sup>-/-</sup> cDC2 normally express *Zbtb46*<sup>GFP</sup>, related to Figure 6.**

(A) Flow cytometric analysis showing *Zbtb46*<sup>GFP</sup> expression in the splenic cDC2 from mice of the indicated genotypes. Numbers in the two-color histograms indicate the percentage of the gated cells (top and middle). Numbers in the single-color histograms (bottom) indicate *Zbtb46*<sup>GFP+</sup> cell percentage (upper, black) and geometric MFI of the cells (lower, green). (B) A bar graph shows the average geometric MFI  $\pm$  SD ( $n = 3$ ).
